# Supplementary material for: A Comparative Study of CoNi-LDH/ZnO Film for Photocathodic Protection Applications in the Marine Environment
Source: Frontiers journal article supplement (doi:10.3389/fmats.2022.904555), 2022-06-03
Supplement: Table_1.DOCX [file Table_1.DOCX]

**TABLE S1 |** The comparison between our work and other recent reports.

| Materials | Conditions | Band gap (eV) | Photo-induced potential (mV) | Photo-induced current density (μA·cm−2) | Reference |
| --- | --- | --- | --- | --- | --- |
| CoNi-LDH/ZnO-C | 3.5 wt% NaCl | 2.70 | −430 | 4.0 | This work |
| NiFe-LDH/Fe2O3 | 3.5 wt% NaCl | 2.13 | −370 | 0.25 | (Fan et al., 2020) |
| NiAl-LDH | 5.0 wt% NaCl | 2.31 | −100 | 0.08 | (Zhou et al., 2021) |
| NiGa-LDH/TiO2 | 3.5 wt% NaCl | 3.20 | −680 | 24.0 | (Chen et al., 2021) |
| CoNi-LDH/ZnO-C | Na2SO3+NaOH | 2.70 | −750 | 70.0 | This work |
| MOF/TiO2 | Na2S+NaOH | 3.30 | −700 | 20.0 | (Guo et al., 2021) |
| rGO/g-C3N4/ZnS | Na2S+NaOH | 2.99 | −670 | 15.0 | (Zheng et al., 2021) |

**TABLE S2 |** The electrochemical parameters of 304SS, LDH/ZnO-R, and LDH/ZnO-C.

| Samples | Illumination | | Dark | | |
| --- | --- | --- | --- | --- | --- |
| Ecorr (mV) | Icorr (μA·cm−2) | Ecorr (mV) | Icorr (μA·cm−2) |
| 304SS | –170 | 0.040 | –170 | 0.040 |
| LDH/ZnO-R | –390 | 0.98 | −180 | 0.089 |
| LDH/ZnO-C | –420 | 3.61 | −150 | 0.018 |

# **REFERENCES**

Chen, R., Xu, Y., Xie, X., Li, C., Zhu, W., Xiang, Q., et al. (2021). Synthesis of TiO2 nanotubes/nickel-gallium layered double hydroxide heterostructure for highly-efficient photocathodic anticorrosion of 304 stainless steel. *Surf. Coat. Technol.* 424**,** 127641. doi: 10.1016/j.surfcoat.2021.127641.

Fan, L., Zhang, X., Zhang, C., Li, J., Wu, C., Chu, Y., et al. (2020). A highly efficient α-Fe2O3/NiFe(OH)x photoelectrode for photocathodic protection of 304 stainless steel under visible light. *Surf. Coat. Technol.* 403**,** 126407. doi: 10.1016/j.surfcoat.2020.126407.

Guo, S., Chi, L., Zhao, T., Nan, Y., Sun, X., Huang, Y., et al. (2021). Construction of MOF/TiO2 nanocomposites with efficient visible-light-driven photocathodic protection. *J. Electroanal. Chem.* 880**,** 114915. doi: 10.1016/j.jelechem.2020.114915.

Zheng, H., Liu, Y., Zhou, Y., Zhao, D., Wang, D., Yun, L., et al. (2021). Improved photocathodic protection performance of g-C3N4/rGO/ZnS for 304 stainless steel. *J. Phys. Chem. Solids* 148, 109672. doi: 10.1016/j.jpcs.2020.109672.

Zhou, M.-J., Xu, T., and Hu, J.-M. (2021). Ni-Al layered double hydroxide films offering corrosion protection under dark or illuminated conditions. *Surf. Coat. Technol.* 421**,** 127416. doi: 10.1016/j.surfcoat.2021.127416.
